# Supplementary material
Source: Springer Nature journal article supplement (https://www.springermedizin.de/resource/supplementary/12936_2008_790_MOESM1_ESM.pdf/9548936)
Supplement: MOESM1 [file 9548936]

Additional File 1: Comparison of observed species mixtures in different regions by LDR-FMA.

---

|             | <b>Burui</b><br>n = 489 | <b>Wombisa</b><br>n = 491 | <b>Ulupu</b><br>n = 521 | <b>Brukham</b><br>n = 515 | <b>Ilaita</b><br>n = 511 |
|-------------|-------------------------|---------------------------|-------------------------|---------------------------|--------------------------|
| neg         | 180                     | 134                       | 143                     | 117                       | 109                      |
| Pf          | 144                     | 153                       | 133                     | 137                       | 137                      |
| Pv          | 82                      | 72                        | 81                      | 63                        | 52                       |
| Pm          | 6                       | 9                         | 9                       | 7                         | 14                       |
| Po          | 7                       | 1                         | 7                       | 4                         | 3                        |
| Pf+Pv       | 46                      | 62                        | 89                      | 84                        | 82                       |
| Pf+Pm       | 8                       | 28                        | 16                      | 33                        | 51                       |
| Pf+Po       | 4                       | 7                         | 5                       | 9                         | 2                        |
| Pv+Pm       | 2                       | 8                         | 5                       | 6                         | 5                        |
| Pv+Po       | 0                       | 2                         | 3                       | 1                         | 1                        |
| Pm+Po       | 0                       | 0                         | 0                       | 1                         | 0                        |
| Pf+Pv+Pm    | 6                       | 10                        | 20                      | 34                        | 29                       |
| Pf+Pv+Po    | 3                       | 4                         | 8                       | 7                         | 11                       |
| Pf+Pm+Po    | 1                       | 0                         | 0                       | 2                         | 5                        |
| Pv+Pm+Po    | 0                       | 1                         | 1                       | 3                         | 1                        |
| Pf+Pv+Pm+Po | 0                       | 0                         | 1                       | 7                         | 9                        |

---

Pf = *P. falciparum*, Pv = *P. vivax*, Pm = *P. malariae*, Po = *P. ovale*
